1

2

3

4 Improving estimates of pertussis burden in Ontario, Canada 2010-2017 by combining validation and capture-  
5 recapture methodologies

6

7

8 Shilo H. McBurney<sup>1\*</sup>, Jeffrey C. Kwong<sup>1,2,3,4,5</sup>, Kevin A. Brown<sup>1,2,4</sup>, Frank Rudzicz<sup>6,7,8</sup>, Andrew Wilton<sup>4</sup>, Natasha  
9 S. Crowcroft<sup>1,9</sup>

10

11

12 <sup>1</sup> Dalla Lana School of Public Health, University of Toronto, Toronto, Ontario, Canada

13

14 <sup>2</sup> Public Health Ontario, Toronto, Ontario, Canada

15

16 <sup>3</sup> Department of Laboratory Medicine and Pathobiology, University of Toronto, Toronto, Ontario, Canada

17

18 <sup>4</sup> ICES, Toronto, Ontario, Canada

19

20 <sup>5</sup> Department of Family & Community Medicine, University of Toronto, Toronto, Ontario, Canada

21

22 <sup>6</sup> Department of Computer Science, University of Toronto, Toronto, Ontario, Canada

23

24 <sup>7</sup> International Centre for Surgical Safety, Li Ka Shing Knowledge Institute, St. Michael's Hospital, Toronto,  
25 Ontario, Canada

26

27 <sup>8</sup> Vector Institute for Artificial Intelligence, Toronto, Ontario, Canada

28

29 <sup>9</sup> Immunization, Vaccines and Biologicals, World Health Organization, Geneva, Switzerland.

30

31

32

33 \* Corresponding author

34 E-mail: [shilo.mcburney@mail.utoronto.ca](mailto:shilo.mcburney@mail.utoronto.ca) (SHM)

## 1 **Abstract**

2 An underestimation of pertussis burden has impeded understanding of transmission and disallows  
3 effective policy and prevention to be prioritized and enacted. Capture-recapture analyses can improve burden  
4 estimates; however, uncertainty remains around incorporating health administrative data due to accuracy  
5 limitations. The aim of this study is to explore the impact of pertussis case definitions and data accuracy on  
6 capture-recapture estimates. We used a dataset from March 7, 2010 to December 31, 2017 comprised of  
7 pertussis case report, laboratory, and health administrative data. We compared Chao capture-recapture  
8 abundance estimates using prevalence, incidence, and adjusted false positive case definitions. The latter was  
9 developed by removing the proportion of false positive physician billing code-only case episodes after  
10 validation. We calculated sensitivity by dividing the number of observed cases by abundance. Abundance  
11 estimates demonstrated that a high proportion of cases were missed by all sources. Under the primary analysis,  
12 the highest sensitivity of 78.5% (95% CI 76.2-80.9%) for those less than one year of age was obtained using all  
13 sources after adjusting for false positives, which dropped to 43.1% (95% CI 42.4-43.8%) for those one year of  
14 age or older. Most code-only episodes were false positives (91.0%), leading to considerably lower abundance  
15 estimates and improvements in laboratory testing and case report sensitivity using this definition. Accuracy  
16 limitations can be accounted for in capture-recapture analyses using different case definitions and adjustment.  
17 The latter enhanced the validity of estimates, furthering the utility of capture-recapture methods to  
18 epidemiological research. Findings demonstrated that all sources consistently fail to detect pertussis cases.  
19 This is differential by age, suggesting ascertainment and testing bias. Results demonstrate the value of  
20 incorporating real time health administrative data into public health surveillance if accuracy limitations can be  
21 addressed.

## 22 **Introduction**

23 Pertussis remains one of the most common vaccine-preventable diseases in Canada [1]. Despite  
24 being a reportable disease, an underestimation of cases and deaths has impeded understanding of

25 transmission. Ascertainment bias is a key concern, which occurs when atypical cases are underdiagnosed  
26 including older individuals experiencing mild disease [2, 3]. This issue is worsened by testing bias, with  
27 younger, severe cases more likely to be tested, have a positive result, and be reported [4, 5]. Burden  
28 estimates vary regionally based on interactions between case definitions, the type of surveillance and data  
29 available, practitioner knowledge, immunization programs, and the extent of local transmission [4, 6].  
30 Underestimation may be attributed to failing to consider pertussis diagnostically, atypical presentations,  
31 infrequent diagnostic testing, suboptimal test accuracy, lack of uniformity in case definitions, and reporting  
32 issues [2, 5]. In combination with complicated epidemiological characteristics, pertussis surveillance is  
33 consequently challenging [4, 7]. However, monitoring burden is essential for informing and assessing the  
34 impact of immunization programs and policy [4, 6-9].

35 To improve pertussis burden estimates, one strategy is to supplement surveillance data with health  
36 administrative data [10]. When several sources are available, capture-recapture analyses can be used to  
37 better estimate burden [11]. This analytic approach has been recently used to assess completeness of  
38 contact-tracing for Ebola and detection of Covid-19 infections [12, 13]. For pertussis, capture-recapture has  
39 been used to estimate the number of deaths in England and the number of cases in Ontario [10, 14]. The  
40 latter estimated that 21-73% of cases have been missed using combined surveillance, laboratory, and health  
41 administrative data [10]. However, considerable uncertainty in estimation remained around the validity of  
42 using the latter, and particularly Ontario Health Insurance Plan (OHIP) physician billing diagnostic codes. The  
43 aim of this study is to explore the impact of using different pertussis case definitions and adjusting for data  
44 accuracy on capture-recapture results, with the goal of enhancing the utility of this method for improving  
45 burden estimates to inform public health surveillance, prevention, and policy.

## 46 **Methods**

47 The University of Toronto's Health Sciences Research Ethics Board (37885) and the Public Health  
48 Ontario (PHO) Ethics Review Board (2019-006.02) approved this study. Data were linked and analyzed at ICES  
49 (formerly the Institute of Clinical Evaluative Sciences) using unique encoded identifiers.

## 50 **Data sources**

51 We obtained Public Health Information System (iPHIS) and PHO Laboratory Information System  
52 (Labware) data from a PHO linked dataset previously used to improve estimates of pertussis burden in  
53 Ontario [10]. iPHIS data contained confirmed, probable, and "does not meet" (DNM) pertussis case reports.  
54 We considered reports greater than 365 days apart a new case, with data available from April 1, 2006 to  
55 March 31, 2015. When duplicates occurred in the same year, we gave priority to the highest level of  
56 confirmation. Labware data included positive, indeterminate, and negative pertussis laboratory tests, with  
57 cases defined as at least one positive result by PCR or culture. We counted positive results more than 90 days  
58 apart as a new case, and data were available from December 7, 2009 to March 31, 2015.  
59 We updated the PHO dataset until March 31, 2018 and combined it with health administrative data from  
60 December 1, 2009 from three databases held at ICES: the Canadian Institute for Health Information (CIHI)  
61 Discharge Abstract Database (DAD); the CIHI National Ambulatory Care Reporting System (NACRS); and the  
62 Ontario Health Insurance Plan (OHIP) Claims Database (Fig 1). Collected data included ICD-10 codes A37.0  
63 (whooping cough, *Bordetella pertussis*) and A37.9 (whooping cough, unspecified species) from  
64 hospitalizations and emergency room visits and OHIP diagnostic billing code 033 (whooping cough, *Bordetella*  
65 *pertussis*). We restricted OHIP claims to billings from homes, offices, and long-term care facilities. The  
66 Registered Persons Database (RPDB) was used to obtain data on patient sex, age, and date of death. We  
67 excluded health administrative data entries with same-day immunizations as they are unlikely to reflect a  
68 true pertussis case (Fig 1). We excluded all entries with no index date or a date of death prior to the index  
69 date, as well as participants with an invalid unique identifier or who were missing their sex or birth date (Fig  
70 1).

71 **Fig 1. Data flow chart.** †OHIP = physician diagnostic billing codes, DAD = hospitalizations, NACRS = emergency  
72 room visits, iPHIS = reportable cases, Labware = laboratory tests, \*using pertussis-containing immunization  
73 codes G840, G841, and G847 and general immunization codes G538 and G539.

74

## 75 **Case definitions and sensitivity analyses**

76 We developed three case definitions to separately input into capture-recapture models – period  
77 prevalence, incidence with exclusions, and false-positive adjusted (Fig 2). Period prevalence permitted an  
78 individual to have one entry per data source over the study period. We did not apply a time limit to recapture  
79 in other sources, leading to the best recapture scenario. For incidence with exclusions, we incorporated data  
80 entries into episodes using 90-day rules and ruled out administrative data-only episodes with a negative  
81 pertussis laboratory test within 28 days of the episode start (Fig 2 and S1 Fig). This structure required  
82 recapture in other sources to occur within the 90 days before or after the respective episode. Finally, for the  
83 last definition we eliminated the proportion of false positive OHIP code-only episodes from the incidence  
84 with exclusions case definition. To do so, we validated these episodes to obtain a positive predictive value  
85 (PPV) and took a random sample based on the estimated proportion of true positives. We conducted  
86 validation using a previously developed methodology and cohort from the Electronic Medical Record Primary  
87 Care (EMRPC) database (S1 Appendix) [15, 16]. The PPV was estimated as 8.99%, leading to the removal of  
88 41,062 OHIP-code only entries for the primary analysis (Fig 2).

89

90 **Fig 2. Flow diagram of case definitions.** \*Admin= OHIP physician diagnostic billing codes, DAD  
91 hospitalizations, NACRS emergency room visits, iPHIS = reportable cases, Labware = laboratory tests,  
92 †stratified by age groups, < 1 year of age and 1+ years of age.

93

94 To ensure that failure to recapture was not due to data missingness, we applied a study window  
95 based on data availability. We removed cases with a first date before March 7, 2010 and last date after

96 December 31, 2017 to give a buffer of 90 days at each end to ensure an accurate episode start and end date,  
97 which we defined as the earliest and latest date for an episode in any data source. Finally, we applied three  
98 sensitivity analyses to the three data structures to explore further uncertainty in case definitions. This  
99 included incorporating iPHIS probable cases, iPHIS probable and DNM cases in addition to indeterminate  
100 laboratory tests, and excluding A37.9 codes with pertussis species unspecified. For the second sensitivity  
101 analysis, we ruled out episodes with a negative pertussis laboratory test within 28 days of the episode start if  
102 the episode only included administrative data or DNM entries.

### 103 **Capture-recapture analyses**

104 Capture-recapture estimates abundance using the cases identified in each source and their overlap  
105 to calculate the number missed by all [17]. We assumed the population was closed and that temporality was  
106 present [10, 18]. We combined all administrative data into a single source at the outset, assuming and  
107 thereby accounting for dependency [11]. We assessed other dependencies by calculating the probability of  
108 being captured in one source given being in another [10]. Additionally, we evaluated random detection using  
109 Pearson's chi-squared tests of the observed versus expected number of cases in a pair of sources [10]. Both  
110 were assessed under the prevalence structure to ensure the assumption of independence for these tests was  
111 not violated. We used these results to select a dependency structure in combination with theoretical  
112 considerations [19]. We evaluated heterogeneity by assessing the linearity of heterogeneity graphs [18].  
113 We used models that accounted for a closed population, temporality, and heterogeneity if determined to be  
114 present. The latter was expected as milder, older cases of pertussis are less likely to be tested, have a positive  
115 result, and be reported to surveillance [4, 5]. We explicitly built the selected dependency structure into  
116 models by including two-way interaction coefficients for sources hypothesized to be dependent [11]. We  
117 chose Chao's lower bound estimator for total sample size for the capture-recapture models, which  
118 additionally accounts for dependency [11]. We compared model estimates to those from Darroch models,  
119 which further correct for heterogeneity [20]. We rounded estimates of abundance to the nearest whole

120 number. We considered results statistically significant at  $\alpha \leq 0.05$  and we used the Rcapture package in R  
121 [18, 21].

## 122 **Estimated sensitivity**

123 We calculated sensitivity by dividing the number of cases identified by each data source by the  
124 estimated abundance [10]. For the incidence and adjusted false positive case definitions, there was concern  
125 that correlation (clustering) would arise from having multiple cases for some individuals, impacting the  
126 sensitivity point estimate and variance [22, 23]. To address this, sensitivity was additionally calculated under  
127 both definitions by selecting a random episode per person to remove the effect of clustering. We then  
128 compared these results to those including multiple episodes, with little difference used as evidence that  
129 estimates were robust.

## 130 **Results**

### 131 **Capture-recapture results**

132 Under the prevalence case definition, all sources were dependent based on pair-wise probabilities  
133 and Pearson's chi-squared test was highly significant ( $p < 0.00001$ ), suggesting non-random detection. This  
134 provided support for the theorized dependency structure, and we used all two-way interaction terms to  
135 account for dependency between each source pair. To ensure comparability between case definitions, we  
136 used this structure for all capture-recapture models. A visual depiction of dependency is presented in Fig 3  
137 using the degree of overlap between data sources under prevalence. Heterogeneity graphs lacked linearity,  
138 indicating heterogeneity was present and had to be accounted for in modelling (S2 Fig).

139

140 **Fig 3. Example of overlap between data sources<sup>†</sup>, all age groups combined under the period prevalence**

141 **primary analysis.** <sup>†</sup>Administrative data = OHIP physician diagnostic billing codes, DAD hospitalizations, NACRS  
142 emergency room visits, iPHIS = reportable cases, Labware = laboratory tests.

143 Estimated abundance was similar for those less than one year of age under the definitions for period  
144 prevalence and incidence with exclusions, at 3810 (95% CI 2932-5707) and 3078 (95% CI 2362-4609)  
145 respectively (Table 1). Abundance was considerably lower with less variability, as measured by the width of  
146 the 95% CIs, for the adjusted false positive definition at 1151 (95% CI 964-1538). Overall, the one year or  
147 older age group had more variable estimates. Abundance for this age group was again similar under  
148 prevalence and incidence, at 114,135 (95% CI 87,228-155,391) and 132,528 (95% CI 100,384-181,775). The  
149 false positive definition had substantially lower estimates and variability at 20,490 (95% CI 15,998-27,319).  
150 Darroch models produced identical abundance estimates in scenarios with more than one two-way  
151 interaction term.



**Table 1. Capture-recapture model results with all two-way interactions between sources by analysis, age group, and case definition.**

|                                           | Total observed pertussis cases | Chao model with all two-way interactions |                 |             |
|-------------------------------------------|--------------------------------|------------------------------------------|-----------------|-------------|
|                                           |                                | Estimated abundance                      | 95% CI          | AIC, BIC*   |
| <b>PRIMARY ANALYSIS</b>                   |                                |                                          |                 |             |
| <i>&lt; 1 year of age</i>                 |                                |                                          |                 |             |
| Period prevalence                         | 2636                           | 3810                                     | 2932-5707       | 56.9, 98.1  |
| Incidence with exclusions                 | 2118                           | 3078                                     | 2362-4609       | 56.8, 96.4  |
| Adjusted false positives                  | 904                            | 1151                                     | 964-1538        | 55.4, 89.1  |
| <i>1+ years of age</i>                    |                                |                                          |                 |             |
| Period prevalence                         | 46,295                         | 114,135                                  | 87,228-155,391  | 69.9, 131.1 |
| Incidence with exclusions                 | 48,676                         | 132,528                                  | 100,384-181,775 | 70.1, 131.6 |
| Adjusted false positives                  | 8828                           | 20,490                                   | 15,998-27,319   | 68.1, 117.7 |
| <b>SENSITIVITY ANALYSIS 1<sup>†</sup></b> |                                |                                          |                 |             |
| <i>&lt; 1 year of age</i>                 |                                |                                          |                 |             |
| Period prevalence                         | 2648                           | 4030                                     | 3003-6240       | 57.3, 98.5  |
| Incidence with exclusions                 | 2133                           | 3235                                     | 2418-4974       | 57.1, 96.8  |
| Adjusted false positives                  | 897                            | 1163                                     | 963-1575        | 55.7, 89.3  |
| <i>1+ years of age</i>                    |                                |                                          |                 |             |
| Period prevalence                         | 46,581                         | 102,954                                  | 80,534-136,981  | 70.8, 132.1 |
| Incidence with exclusions                 | 49,015                         | 119,684                                  | 92,638-160,724  | 71.1, 132.7 |
| Adjusted false positives                  | 9295                           | 19,120                                   | 15,339-24,804   | 69.1, 119.0 |
| <b>SENSITIVITY ANALYSIS 2<sup>†</sup></b> |                                |                                          |                 |             |
| <i>&lt; 1 year of age</i>                 |                                |                                          |                 |             |
| Period prevalence                         | 2729                           | 9197                                     | 6180-14,619     | 60.7, 102.1 |
| Incidence with exclusions                 | 2206                           | 7883                                     | 5205-12,740     | 60.1, 100.0 |
| Adjusted false positives                  | 1007                           | 2454                                     | 1759-3691       | 58.8, 93.2  |
| <i>1+ years of age</i>                    |                                |                                          |                 |             |
| Period prevalence                         | 47,257                         | 224,995                                  | 187,309-272,926 | 75.2, 136.5 |
| Incidence with exclusions                 | 49,551                         | 252,872                                  | 209,058-308,891 | 74.9, 136.6 |
| Adjusted false positives                  | 9917                           | 37,868                                   | 31,802-45,596   | 72.9, 123.3 |
| <b>SENSITIVITY ANALYSIS 3<sup>†</sup></b> |                                |                                          |                 |             |
| <i>&lt; 1 year of age</i>                 |                                |                                          |                 |             |
| Period prevalence                         | 2050                           | 3615                                     | 2585-5857       | 57.4, 96.8  |
| Incidence with exclusions                 | 1863                           | 3249                                     | 2341-5192       | 57.4, 96.1  |
| Adjusted false positives                  | 626                            | 769                                      | 671-963         | 55.1, 86.2  |
| <i>1+ years of age</i>                    |                                |                                          |                 |             |
| Period prevalence                         | 42,446                         | 171,908                                  | 119,993-257,414 | 69.2, 129.8 |
| Incidence with exclusions                 | 46,411                         | 207,041                                  | 143,834-311,111 | 69.4, 130.6 |
| Adjusted false positives                  | 6541                           | 21,678                                   | 15,685-31,450   | 67.0, 114.5 |

153

\*AIC = Akaike information criterion and BIC = Bayesian information criterion, for both lower values indicate a comparably better model fit

154

<sup>†</sup>Sensitivity analysis 1 = including probable iPHIS case reports, Sensitivity analysis 2 = including iPHIS probable and “does not meet” case reports and Labware indeterminate

155

laboratory tests, Sensitivity analysis 3 = removing A37.9 codes with pertussis species unspecified

## 156 **Sensitivity analyses**

157           After the addition of probable iPHIS cases, there was little change to estimated abundance (Table  
158 5.1). Including iPHIS probable and DNM cases and indeterminate laboratory tests produced the largest  
159 increase in abundance and introduced a considerable amount of variability. While this pattern occurred  
160 under all case definitions, the highest estimate of 252,872 (95% CI 209,058-308,891) was obtained under  
161 incidence for those one year of age or older. After removing A37.9 codes, abundance estimates increased  
162 and decreased without a reliable pattern.

## 163 **Estimated sensitivity**

164           Sensitivity estimates are available in Table 2. Results were comparable and generally within a few  
165 percentage points with and without multiple episodes per individual (S1 Table). As a result, clustering was  
166 determined to have a minimal effect and we reported sensitivity estimates that included multiple episodes  
167 per individual. Using all data sources consistently provided the highest sensitivity (Table 2). Labware had the  
168 lowest sensitivity while administrative data had the highest for a single source. Under the primary analysis  
169 and prevalence definition, the highest sensitivity for those less than one year of age was 69.2% (95% CI 67.7-  
170 70.7%), which dropped to 40.6% (95% CI 40.3-40.8%) for the older age group. Incidence sensitivity estimates  
171 were similar but slightly lower in comparison, excepting marginally higher estimates for iPHIS and Labware  
172 for the younger age group. Overall, using the adjusted false positive definition increased sensitivity, with all  
173 sources under the primary analysis producing a sensitivity of 78.5% (95% CI 76.2-80.9%) and 43.1% (95% CI  
174 42.4-43.8%) for the younger and older age groups respectively. However, the largest increase to sensitivity  
175 occurred for iPHIS and Labware estimates, although sensitivity for these sources remained low for the older  
176 age group.

**Table 2. Estimated sensitivity by case definition, age group, analysis, and data source.**

| Analysis                            | Data source      | PERIOD PREVALENCE |                          |            | INCIDENCE WITH EXCLUSIONS |                      |            | ADJUSTED FALSE POSITIVES |                     |            |
|-------------------------------------|------------------|-------------------|--------------------------|------------|---------------------------|----------------------|------------|--------------------------|---------------------|------------|
|                                     |                  | Sensitivity (%)   | (n/N) <sup>§</sup>       | 95% CI (%) | Sensitivity (%)           | (n/N) <sup>§</sup>   | 95% CI (%) | Sensitivity (%)          | (n/N) <sup>§</sup>  | 95% CI (%) |
| <b>&lt; 1 YEAR OF AGE</b>           |                  |                   |                          |            |                           |                      |            |                          |                     |            |
| Primary analysis                    | All data sources | 69.2              | (2636/3810)              | 67.7-70.7  | 68.8                      | (2118/3078)          | 67.2-70.4  | 78.5                     | (904/1151)          | 76.2-80.9  |
|                                     | Admin data       | 66.0              | (2516/3810)              | 64.5-67.5  | 64.8                      | (1994/3078)          | 63.1-66.5  | 67.8                     | (780/1151)          | 65.1-70.5  |
|                                     | Labware          | 9.69              | (369/3810)               | 8.75-10.6  | 12.0-12.1                 | (368-372/3078)*      | 10.8-13.2  | 32.0-32.3                | (368-372/1151)*     | 29.3-35.0  |
|                                     | iPHIS            | 12.1              | (461/3810)               | 11.1-13.1  | 14.8-14.9                 | (456-460/3078)*      | 13.7-16.2  | 39.6-40.0                | (456-460/1151)*     | 36.8-42.8  |
| Sensitivity analysis 1 <sup>†</sup> | All data sources | 65.7              | (2648/4030)              | 64.2-67.2  | 65.9                      | (2133/3235)          | 64.3-67.6  | 77.1                     | (897/1163)          | 74.7-79.5  |
|                                     | Admin data       | 62.4              | (2516/4030)              | 60.9-63.9  | 61.6-61.7                 | (1993-1997/3235)     | 60.1-63.4  | 65.4                     | (761/1163)          | 63.8-67.0  |
|                                     | Labware          | 9.16              | (369/4030)               | 8.27-10.0  | 11.4-11.5                 | (368-372/3235)*      | 10.3-12.6  | 31.6-32.0                | (368-372/1163)*     | 30.1-33.2  |
|                                     | iPHIS            | 11.9              | (481/4030)               | 10.9-12.9  | 14.7-14.8                 | (476-480/3235)*      | 13.5-16.1  | 40.9-41.3                | (476-480/1163)*     | 39.6-42.9  |
| Sensitivity analysis 2 <sup>‡</sup> | All data sources | 29.7              | (2729/9197)              | 28.7-30.6  | 28.0                      | (2206/7883)          | 27.0-29.0  | 41.0                     | (1007/2454)         | 39.1-43.0  |
|                                     | Admin data       | 27.3-27.4         | (2515-2519/9197)*        | 26.4-28.3  | 25.3-25.4                 | (1995-1999/7883)*    | 24.3-26.3  | 32.6                     | (800/2454)          | 30.7-34.5  |
|                                     | Labware          | 5.09              | (468/9197)               | 4.64-5.54  | 5.95-6.00                 | (469-473/7883)*      | 5.43-6.52  | 19.1                     | (469/2454)          | 17.6-20.7  |
|                                     | iPHIS            | 5.96              | (548/9197)               | 5.47-6.44  | 6.56                      | (517/7883)           | 6.01-7.10  | 21.1                     | (517/2454)          | 19.5-22.7  |
| Sensitivity analysis 3 <sup>†</sup> | All data sources | 56.7              | (2050/3615)              | 55.1-58.3  | 57.3                      | (1863/3249)          | 55.6-59.0  | 81.4                     | (626/769)           | 78.7-84.2  |
|                                     | Admin data       | 50.7              | (1832/3615)              | 49.0-52.3  | 50.5                      | (1642/3249)          | 48.8-52.3  | 52.7                     | (405/769)           | 49.1-56.2  |
|                                     | Labware          | 10.2-10.3         | (368-372/3615)*          | 9.19-11.3  | 11.3-11.4                 | (368-372/3249)*      | 10.2-12.5  | 47.9-48.4                | (368-372/769)*      | 44.3-51.9  |
|                                     | iPHIS            | 12.8              | (461/3615)               | 11.7-13.8  | 14.2                      | (461/3249)           | 13.0-15.4  | 59.9                     | (461/769)           | 56.5-63.4  |
| <b>1 + YEARS OF AGE</b>             |                  |                   |                          |            |                           |                      |            |                          |                     |            |
| Primary analysis                    | All data sources | 40.6              | (46,295/114,135)         | 40.3-40.8  | 36.7                      | (48,676/132,528)     | 36.5-37.0  | 43.1                     | (8823/20,490)       | 42.4-43.8  |
|                                     | Admin data       | 39.4              | (44,933/114,135)         | 39.1-39.7  | 35.7                      | (47,292/132,528)     | 35.4-35.9  | 36.3                     | (7444/20,490)       | 35.7-37.0  |
|                                     | Labware          | 1.43              | (1636/114,135)           | 1.36-1.50  | 1.24                      | (1637-1641/132,528)* | 1.18-1.30  | 7.99-8.01                | (1637-1641/20,490)* | 7.62-8.38  |
|                                     | iPHIS            | 2.02              | (2307/114,135)           | 1.94-2.10  | 1.74                      | (2305-2309/132,528)* | 1.67-1.81  | 11.2-11.3                | (2305-2309/20,490)* | 10.8-11.7  |
| Sensitivity analysis 1 <sup>†</sup> | All data sources | 45.2              | (46,581/102,954)         | 44.9-45.5  | 41.0                      | (49,015/119,684)     | 40.7-41.2  | 48.6                     | (9295/19,120)       | 47.9-49.3  |
|                                     | Admin data       | 43.6              | (44,931-44,935/102,954)* | 43.3-43.9  | 39.6                      | (47,339/119,684)     | 37.9-41.2  | 39.8                     | (7619/19,120)       | 38.2-41.5  |
|                                     | Labware          | 1.59              | (1636/102,954)           | 1.51-1.67  | 1.37                      | (1637-1641/119,684)* | 0.98-1.76  | 8.56-8.58                | (1637-1641/19,120)* | 7.62-9.53  |
|                                     | iPHIS            | 2.72              | (2800/102,954)           | 2.62-2.82  | 2.34                      | (2798-2802/119,684)* | 1.83-2.85  | 14.6-14.7                | (2798-2802/19,120)* | 13.5-15.8  |
| Sensitivity analysis 2 <sup>‡</sup> | All data sources | 21.0              | (47,257/224,995)         | 20.8-21.2  | 19.6                      | (49,551/252,872)     | 19.4-19.8  | 26.2                     | (9917/37,868)       | 25.7-26.6  |
|                                     | Admin data       | 20.0              | (44,926/224,995)         | 19.8-20.1  | 18.7                      | (47,346/252,872)     | 18.6-18.9  | 20.4                     | (7712/37,868)       | 20.0-20.8  |
|                                     | Labware          | 1.03              | (2318/224,995)           | 0.99-1.07  | 0.92                      | (2318-2322/252,872)* | 0.88-0.96  | 6.12-6.13                | (2318-2322/37,868)* | 5.88-6.37  |
|                                     | iPHIS            | 1.48              | (3332/224,995)           | 1.43-1.53  | 1.22                      | (3079/252,872)       | 1.17-1.26  | 8.13                     | (3079/37,868)       | 7.86-8.41  |
| Sensitivity analysis 3 <sup>†</sup> | All data sources | 24.7              | (42,446/171,908)         | 24.5-24.9  | 22.4                      | (46,411/207,041)     | 22.2-22.6  | 30.2                     | (6541/21,678)       | 29.6-30.8  |
|                                     | Admin data       | 23.7              | (40,710/171,908)         | 23.5-23.9  | 21.6                      | (44,657/207,041)     | 21.4-21.7  | 22.1                     | (4787/21,678)       | 20.7-23.5  |
|                                     | Labware          | 0.95              | (1633-1637/171,908)*     | 0.90-1.00  | 0.79                      | (1633-1637/207,041)* | 0.75-0.83  | 7.53-7.55                | (1633-1637/21,678)* | 6.64-8.44  |
|                                     | iPHIS            | 1.34-1.35         | (2310-2314/171,908)*     | 1.29-1.40  | 1.12                      | (2311-2315/207,041)* | 1.07-1.16  | 10.7                     | (2311-2315/21,678)* | 9.62-11.7  |

178

\*suppressed for reporting due to low cell size (direct or by inference)

179

§the observed in individual data sources will not sum to the observed in all data sources due to overlap between sources

180

†Sensitivity analysis 1 = including probable iPHIS case reports, Sensitivity analysis 2 = including iPHIS probable and “does not meet” case reports and Labware indeterminate laboratory tests,

181

Sensitivity analysis 3 = removing A37.9 codes with pertussis species unspecified

182 Any change to sensitivity estimates after the addition of probable iPHIS cases was small, within 5%.  
183 After including iPHIS probable and DNM cases and indeterminate laboratory tests, the sensitivity estimates  
184 for all sources combined were more similar between age groups. Under prevalence, sensitivity was 29.7%  
185 (95% CI 28.7-30.6%) and 21.0% (95% CI 20.8-21.2%) for the younger and older groups respectively. Excluding  
186 A37.9 codes under the adjusted false positive definition led to the highest Labware and iPHIS sensitivity  
187 estimates for the younger age group, at close to 50% and 60%.

## 188 Discussion

189 Abundance estimates demonstrated that a high proportion of pertussis cases were missed by all  
190 sources. Results were similar when using prevalence and incidence, but after adjusting for physician billing  
191 code-only false positives abundance dropped considerably. While this occurred for both age groups, the  
192 effect was greater among those one year of age or older. The low estimated PPV of physician billing code-  
193 only episodes provides evidence that false positives have been inflating observed counts and abundance  
194 estimates, which decreased sensitivity for laboratory and case report data. As a result, the adjusted case  
195 definition is the most valid out of those tested, with the described approach useful for improving the utility of  
196 capture-recapture methods to epidemiological surveillance. Regardless of the case definition, health  
197 administrative data had the highest sensitivity for a single source, with all sources combined producing the  
198 best sensitivity. This establishes the value of incorporating health administrative data into pertussis  
199 surveillance if accuracy and timeliness limitations are addressed. Laboratory tests had the lowest sensitivity  
200 and particularly for the older age group, indicating testing bias is present. Public health case reports had  
201 slightly higher sensitivity but displayed a similar pattern. While sensitivity estimates improved for both after  
202 adjusting for false positives, this was primarily in the younger age group. Overall, sensitivity was substantially  
203 lower for the older group, suggesting ascertainment bias is present.

204 A 2018 Ontario capture-recapture study used the same data sources but over fewer years. As a  
205 result, abundance is not directly comparable as the higher estimates from this study are expected due to the

206 extra years of data. However, sensitivity for all sources with probable case reports included was estimated at  
207 54% and 39% for the younger and older age groups respectively. This is comparable to sensitivity estimates  
208 for the older age group in this study after including iPHIS probable cases, but sensitivity was higher for the  
209 younger group (~66%). This could be due to improved recapture in this subgroup using the case definitions or  
210 differences in how the 2018 study modelled dependencies [10]. The 2018 study reported considerable  
211 uncertainty persisting around physician billing code accuracy and investigated by using different proportions  
212 of true positives for all health administrative data, with the lowest at 25%. This dropped abundance  
213 estimates by 66% and 73% for the younger and older age groups [10]. We were able to address remaining  
214 uncertainty through validation of physician billing code-only episodes. Interestingly, applying the estimated  
215 PPV of 8.99% to these episodes reduced abundance estimates similarly to assuming a PPV of 25% for all  
216 health administrative data in the 2018 study, by 64% and 84%. The higher latter value indicates a greater  
217 proportion of code only-episodes in the older age group, leading to enhanced improvement in recapture  
218 once removed. Laboratory test and case report sensitivity considerably improved using this case definition.  
219 A modelling study based on pertussis incidence in southern Ontario from 1993-2004 estimated that five to  
220 33,032 cases remain undetected per reported case depending on age [3]. It has been stated elsewhere that  
221 the true number of pertussis cases is at least three times higher than what is reported [2]. To compare,  
222 estimates from this study should be calculated using the false positive case definition to avoid inflating  
223 underdetection. For case report data, these values are 2.5 and 8.9 for the younger and older age groups  
224 under the primary analysis and 4.7 and 12 after including probable and DNM case reports and indeterminate  
225 laboratory tests. Using all data sources, 1.3 and 2.3 cases were missed per observed case for the younger and  
226 older age groups, which increased to 2.4 and 3.8 with the additional case reports and laboratory tests. The  
227 substantially lower upper limit compared to the modelling study is likely due to differences in age groups,  
228 pertussis incidence during the respective time periods, and diagnostic testing accuracy, with PCR introduced  
229 after 2004. In addition, the estimation approaches differ, with the modelling study using methods with  
230 considerable uncertainty as reflected by the wide range of values. While this study used the more

231 conservative Chao's lower bound estimator, similar results were obtained from Darroch models.  
232 Furthermore, a simulation study found that Chao's methods estimated abundance within 75-82% of the total  
233 population size in most complicated scenarios [11]. Regardless, this study's findings are in line with past  
234 estimates of underdetection, with reasonable explanations for remaining differences.

235 The estimated PPV for physician billing code-only episodes of 8.99% (95% CI 1.59-16.39%) is  
236 comparable to the PPV of 13.6% (95% CI 9.28-17.9%) obtained for an OHIP physician billing code algorithm  
237 within the EMRPC using the same cohort [16]. The slightly higher PPV in the EMRPC can be explained by using  
238 prevalent cases, increasing the likelihood of concordance between codes and cases. Additionally, EMRPC  
239 billing codes were only collected from physician offices, potentially decreasing the number of false positives.  
240 OHIP pertussis cases billed at homes or long-term care facilities are unlikely to be documented in EMRPC's  
241 primary care patient records. Further contributing to this issue is that visits outside office settings such as  
242 walk-in or specialist visits fail to be captured in the EMRPC, leading to about 15% of interactions being missed  
243 [24]. In addition, only two thirds of the laboratory tests in OHIP are documented in the EMRPC [24]. Missing  
244 any of these data in the EMRPC could artificially decrease the PPV of OHIP billing code-only episodes by  
245 increasing the number of false positives, although billings from outside office settings were uncommon in the  
246 OHIP database and unlikely to greatly affect validation. The EMRPC study only tested the accuracy of data  
247 available in the EMRPC, meaning sensitivity estimates for emergency room visits, hospitalizations, and case  
248 report data are not available. However, pertussis laboratory test sensitivity using prevalent cases was  
249 reported as 0.64% (95% CI 0.37-1.09%) across all ages [16]. After adjusting for false positives, 8.0% sensitivity  
250 (95% CI 7.62-8.38%) was obtained for the older age group (which only excludes infants) using prevalence.  
251 This difference can be explained by variation in ages, pertussis classification, and validation methods.  
252 Additionally, Labware has more comprehensive coverage, with the EMRPC noted to have decreased  
253 laboratory test sensitivity through incomplete documentation [16].

254 One limitation of this study is that we did not validate physician billing code-only episodes separately  
255 for the younger and older age groups. This was to preserve an adequate sample size, with the assumption

256 that the PPV averages out across age groups and this is an appropriate strategy for taking a random sample  
257 based on a proportion. In addition, while demonstrating that sensitivity estimates differ by age group, it is  
258 unlikely that PPV would vary to the same extent. PPV evaluates the proportion of true positives out of test  
259 positives and is primarily affected by prevalence, not testing bias [25]. Although it may appear that younger  
260 individuals have a higher risk of pertussis infection, due to testing and ascertainment bias this may not  
261 actually be the case [4]. Older cases are hypothesized to be an important source of pertussis, which is evident  
262 through older relatives being key sources of transmission to infants [4, 26]. Additionally, in 2019, 62% of  
263 reported cases in Ontario occurred in those ten years of age or older [27]. However, it may be of interest to  
264 allow the PPV to vary separately by age group in future analyses.

265 An additional limitation is that we had to remove EMRPC cases without dates during validation. We  
266 considered it preferable to avoid introducing misclassification rather than preserving the sample size, and  
267 there is no reason to suspect excluded cases are systematically different from the majority of those included.  
268 A further limitation of validation is that we were unable to adjust the PPV and sensitivity estimates for  
269 clustering under the incidence and false positive definitions due to the low sample size and study  
270 methodology respectively [22, 23]. To address this, we compared point estimates and variances to those  
271 using a single episode per individual to assess the effect of correlation, with little difference found between  
272 PPV estimates. While some sensitivity estimates were statistically significantly different, the absolute  
273 difference was small, and this was for the older age group where large sample sizes produced substantial  
274 precision. As a result, we concluded that these differences were unlikely to be clinically significant. While it is  
275 possible correlation still minorly affected the findings, it is a study strength to be able to report sensitivity  
276 estimates under different case definitions. Little validation research has incorporated repeated episodes,  
277 which is of interest for acute diseases.

278 Finally, missing data may impact abundance and sensitivity estimates, but this is an inherent  
279 limitation of using secondary data and beyond the scope of this study. This includes failing to collect data on  
280 certain cases, such as those that are milder in nature who do not seek health care or may be misdiagnosed.

281 While pertussis infectivity is related to severity, meaning that milder undetected cases are likely less  
282 infectious, it is possible that many are still important to transmission. While Labware data only covers  
283 pertussis laboratory testing for < 95% of Ontario, we assumed that the remaining tests would not  
284 considerably impact abundance estimates [10, 28]. To assess the effect of missing data, we conducted  
285 sensitivity analyses incorporating additional data to determine the robustness of capture-recapture  
286 abundance estimates. This produced little change to results, except when including probable and DNM cases  
287 in addition to indeterminate laboratory tests. Doing so decreased sensitivity and led to greater similarity in  
288 capture patterns between the younger and older age groups. This could suggest that older individuals are less  
289 likely to meet the confirmed case definition, or that milder infections are frequently missed in younger as  
290 well as older individuals. Alternatively, it could be due to increased uncertainty in abundance among both  
291 groups under this analysis, stemming from greater uncertainty in true pertussis status.

## 292 **Conclusions**

293 This study demonstrated how limited health data accuracy can be accounted for using capture-  
294 recapture analyses that employ different pertussis case definitions. The false-positive adjusted case definition  
295 helped address past uncertainty in burden estimation and produced results which align with the degree of  
296 underdetection reported in the literature; improved capture-recapture estimates can better inform public  
297 health policy and prevention. Findings consistently demonstrated that data sources are failing to detect  
298 pertussis cases, and particularly laboratory and case report data. The best sensitivity was obtained by using  
299 all sources together, with health administrative data having the highest sensitivity for a single source. This  
300 indicates the benefit of incorporating real time health administrative data into surveillance if misclassification  
301 can be addressed. The results provide further support that pertussis detection differs by age, indicating that  
302 ascertainment and testing bias is present in data.



## 303 Acknowledgements

304 The authors acknowledge the assistance of Branson Chen and John Wang with data preparation and  
305 Arezou Saedi and Mohammad Ali Moinshaghghi with record abstraction.

## 306 References

- 307 1. Public Health Agency of Canada. Reported cases from 1924 to 2019 in Canada – Notifiable diseases  
308 on-line; [updated 2021 July 20; cited 2022 March 3]. Database: Government of Canada [Internet].  
309 Available from: <http://diseases.canada.ca/notifiable/charts?c=pl>.
- 310 2. Kilgore PE, Salim AM, Zervos MJ, Schmitt H-J. Pertussis: Microbiology, disease, treatment, and  
311 prevention. *Clin Microbiol Rev*. 2016;29(3): 449-486. doi: 10.1128/CMR.00083-15.
- 312 3. McGirr AA, Tuite AR, Fisman DN. Estimation of the underlying burden of pertussis in adolescents and  
313 adults in Southern Ontario, Canada. *PLoS One*. 2013;8(12): e83850. doi:  
314 10.1371/journal.pone.0083850.
- 315 4. Crowcroft N, Miller E. Pertussis epidemiology. In: Rohani P, Scarpino S, editors. *Pertussis:*  
316 *Epidemiology, immunology, and evolution*. Oxford, UK: Oxford University Press; 2019. pp. 66-86.
- 317 5. Deeks S, De Serres G, Boulianne N, Duval B, Rochette L, Dery P, et al. Failure of physicians to consider  
318 the diagnosis of pertussis in children. *Clin Infect Dis*. 1999;28(4): 840-846. doi: 10.1086/515203.
- 319 6. Bolotin S, Quinn H, McIntyre P. Surveillance and diagnostics. In: Rohani P, Scarpino S, editors.  
320 *Pertussis: Epidemiology, immunology, and evolution*. Oxford, UK: Oxford University Press; 2019. pp.  
321 193-210.
- 322 7. World Health Organization. *Pertussis: Vaccine-Preventable Diseases Surveillance Standards*.  
323 [Internet]. WHO; 2018. Available from: [https://www.who.int/publications/m/item/vaccine-](https://www.who.int/publications/m/item/vaccine-preventable-diseases-surveillance-standards-pertussis)  
324 [preventable-diseases-surveillance-standards-pertussis](https://www.who.int/publications/m/item/vaccine-preventable-diseases-surveillance-standards-pertussis).

- 325 8. Barkoff AM, Grondahl-Yli-Hannuksela K, He Q. Seroprevalence studies of pertussis: What have we  
326 learned from different immunized populations. *Pathog Dis*. 2015;73(7): ftv050. doi:  
327 10.1093/femspd/ftv050.
- 328 9. Crowcroft NS, Stein C, Duclos P, Birmingham M. How best to estimate the global burden of pertussis?  
329 *Lancet Infect Dis*. 2003;3(7): 413-418. doi: 10.1016/s1473-3099(03)00669-8.
- 330 10. Crowcroft NS, Johnson C, Chen C, Li Y, Marchand-Austin A, Bolotin S, et al. Under-reporting of  
331 pertussis in Ontario: A Canadian Immunization Research Network (CIRN) study using capture-  
332 recapture. *PLoS One*. 2018;13(5): e0195984. doi: 10.1371/journal.pone.0195984.
- 333 11. Braeye T, Verheagen J, Mignon A, Flipse W, Pierard D, Huygen K, et al. Capture-recapture estimators  
334 in epidemiology with applications to pertussis and pneumococcal invasive disease surveillance. *PLoS*  
335 *One*. 2016;11(8): e0159832. doi: 10.1371/journal.pone.0159832.
- 336 12. Böhning D, Rocchetti I, Maruotti A, Holling H. Estimating the undetected infections in the Covid-19  
337 outbreak by harnessing capture-recapture methods. *Int J Infect Dis*. 2020;97: 197-201. doi:  
338 10.1016/j.ijid.2020.06.009.
- 339 13. Polonsky JA, Böhning D, Keita M, Ahuka-Mundeke S, Nsio-Mbeta J, Abedi AA, et al. Novel use of  
340 capture-recapture methods to estimate completeness of contact tracing during an Ebola outbreak,  
341 Democratic Republic of the Congo, 2018-2020. *Emerg Infect Dis*. 2021;27(12): 3063-3072. doi:  
342 10.3201/eid2712.204958.
- 343 14. Crowcroft NS, Andrews N, Rooney C, Brisson M, Miller E. Deaths from pertussis are underestimated  
344 in England. *Arch Dis Child*. 2002;86(5): 336-338. doi: 10.1136/adc.86.5.336.
- 345 15. McBurney SH, Kwong JC, Brown KA, Rudzicz F, Chen B, Candido E, et al. Using electronic medical  
346 records to develop a reference standard for low prevalence disease validation studies: A pertussis  
347 case study. SSRN [Preprint]. 2022. Available from: <https://ssrn.com/abstract=4148223>. doi:  
348 10.2139/ssrn.4148223.

- 349 16. McBurney SH, Kwong JC, Brown KA, Rudzicz F, Chen B, Candido E, et al. Validating pertussis data  
350 measures using electronic medical record data in Ontario, Canada 1986-2016. In: McBurney SH. The  
351 problem with pertussis: Finding undetected pertussis cases in Electronic Medical Record Primary  
352 Care to improve data accuracy and burden estimates. PhD. Thesis, The University of Toronto. 2022.  
353 Available from: <https://tspace.library.utoronto.ca/handle/1807/9945>.
- 354 17. Buehler JW. Surveillance. In: Rothman KJ, Greenland S, Lash TL, editors. Modern epidemiology. 3rd  
355 ed. Philadelphia: Wolters Kluwer Health/Lippincott Williams & Wilkins; 2008. pp. 459-480.
- 356 18. Baillargeon S, Rivest L-P. Rcapture: Loglinear models for capture-recapture in R. *J Stat Softw*.  
357 2007;19(5): 1-31. doi: 10.18637/jss.v019.i05.
- 358 19. Jones HE, Hickman M, Welton NJ, De Angelis D, Harris RJ, Ades AE. Recapture or precapture?  
359 Fallibility of standard capture-recapture methods in the presence of referrals between sources. *Am J*  
360 *Epidemiol*. 2014;179(11): 1383-1393. doi: 10.1093/aje/kwu056.
- 361 20. Rivest L-P, Baillargeon S. Applications and extensions of Chao's moment estimator for the size of a  
362 closed population. *Biometrics*. 2007;63(4): 999-1006. doi: 10.1111/j.1541-0420.2007.00779.x.
- 363 21. R-Core-Team. R: A language and environment for statistical computing. Vienna (AT): R Foundation  
364 for Statistical Computing; 2013.
- 365 22. Ying GS, Maguire MG, Glynn RJ, Rosner B. Calculating sensitivity, specificity, and predictive values for  
366 correlated eye data. *Investig Ophthalmol Vis Sci*. 2020;61(11): 29. doi: 10.1167/iovs.61.11.29.
- 367 23. Genders TS, Spronk S, Stijnen T, Steyerberg EW, Lesaffre E, Hunink MG. Methods for calculating  
368 sensitivity and specificity of clustered data: A tutorial. *Radiology*. 2012;265(3): 910-916. doi:  
369 10.1148/radiol.12120509.
- 370 24. Tu K, Mitiku T, Ivers NM, Guo H, Lu H, Jaakkimainen L. Evaluation of Electronic Medical Record  
371 Administrative data Linked Database (EMRALD). *Am J Manag Care*. 2014;20: e15-21.
- 372 25. Molinaro AM. Diagnostic tests: How to estimate the positive predictive value. *Neurooncol Pract*.  
373 2015;2(4): 162-166. doi: 10.1093/nop/npv030.

- 374 26. Ministry of Health and Long-Term Care. Infectious Diseases Protocol - Appendix A: Disease-Specific  
375 Chapters, Pertussis (Whooping Cough). Government of Ontario; 2019.
- 376 27. Ontario Agency for Health Protection and Promotion. Infectious Disease Trends in Ontario; 2021  
377 [cited 2022 March 3]. Database: Public Health Ontario [Internet]. Available from:  
378 [https://www.publichealthontario.ca/en/data-and-analysis/infectious-disease/reportable-disease-](https://www.publichealthontario.ca/en/data-and-analysis/infectious-disease/reportable-disease-trends-annually#/42)  
379 [trends-annually#/42](https://www.publichealthontario.ca/en/data-and-analysis/infectious-disease/reportable-disease-trends-annually#/42).
- 380 28. Schwartz KL, Kwong JC, Deeks SL, Campitelli MA, Jamieson FB, Marchand-Austin A, et al.  
381 Effectiveness of pertussis vaccination and duration of immunity. *Can Med Assoc J.* 2016;188(16):  
382 E399-e406. doi: 10.1503/cmaj.160193.

## 383 **Supporting Information**

384 **S1 Fig. Rules for developing incident case episodes and establishing data re-capture**

385 **S2 Fig. Heterogeneity graphs from the primary analysis by case definition and age group**

386 **S1 Table. Estimated sensitivity by age group, analysis, and data source for incidence and adjusted false**  
387 **positive case definitions using a single random episode per person**

388 **S1 Appendix. Validation of Ontario Health Insurance Plan (OHIP) billing diagnostic code-only case episodes.**

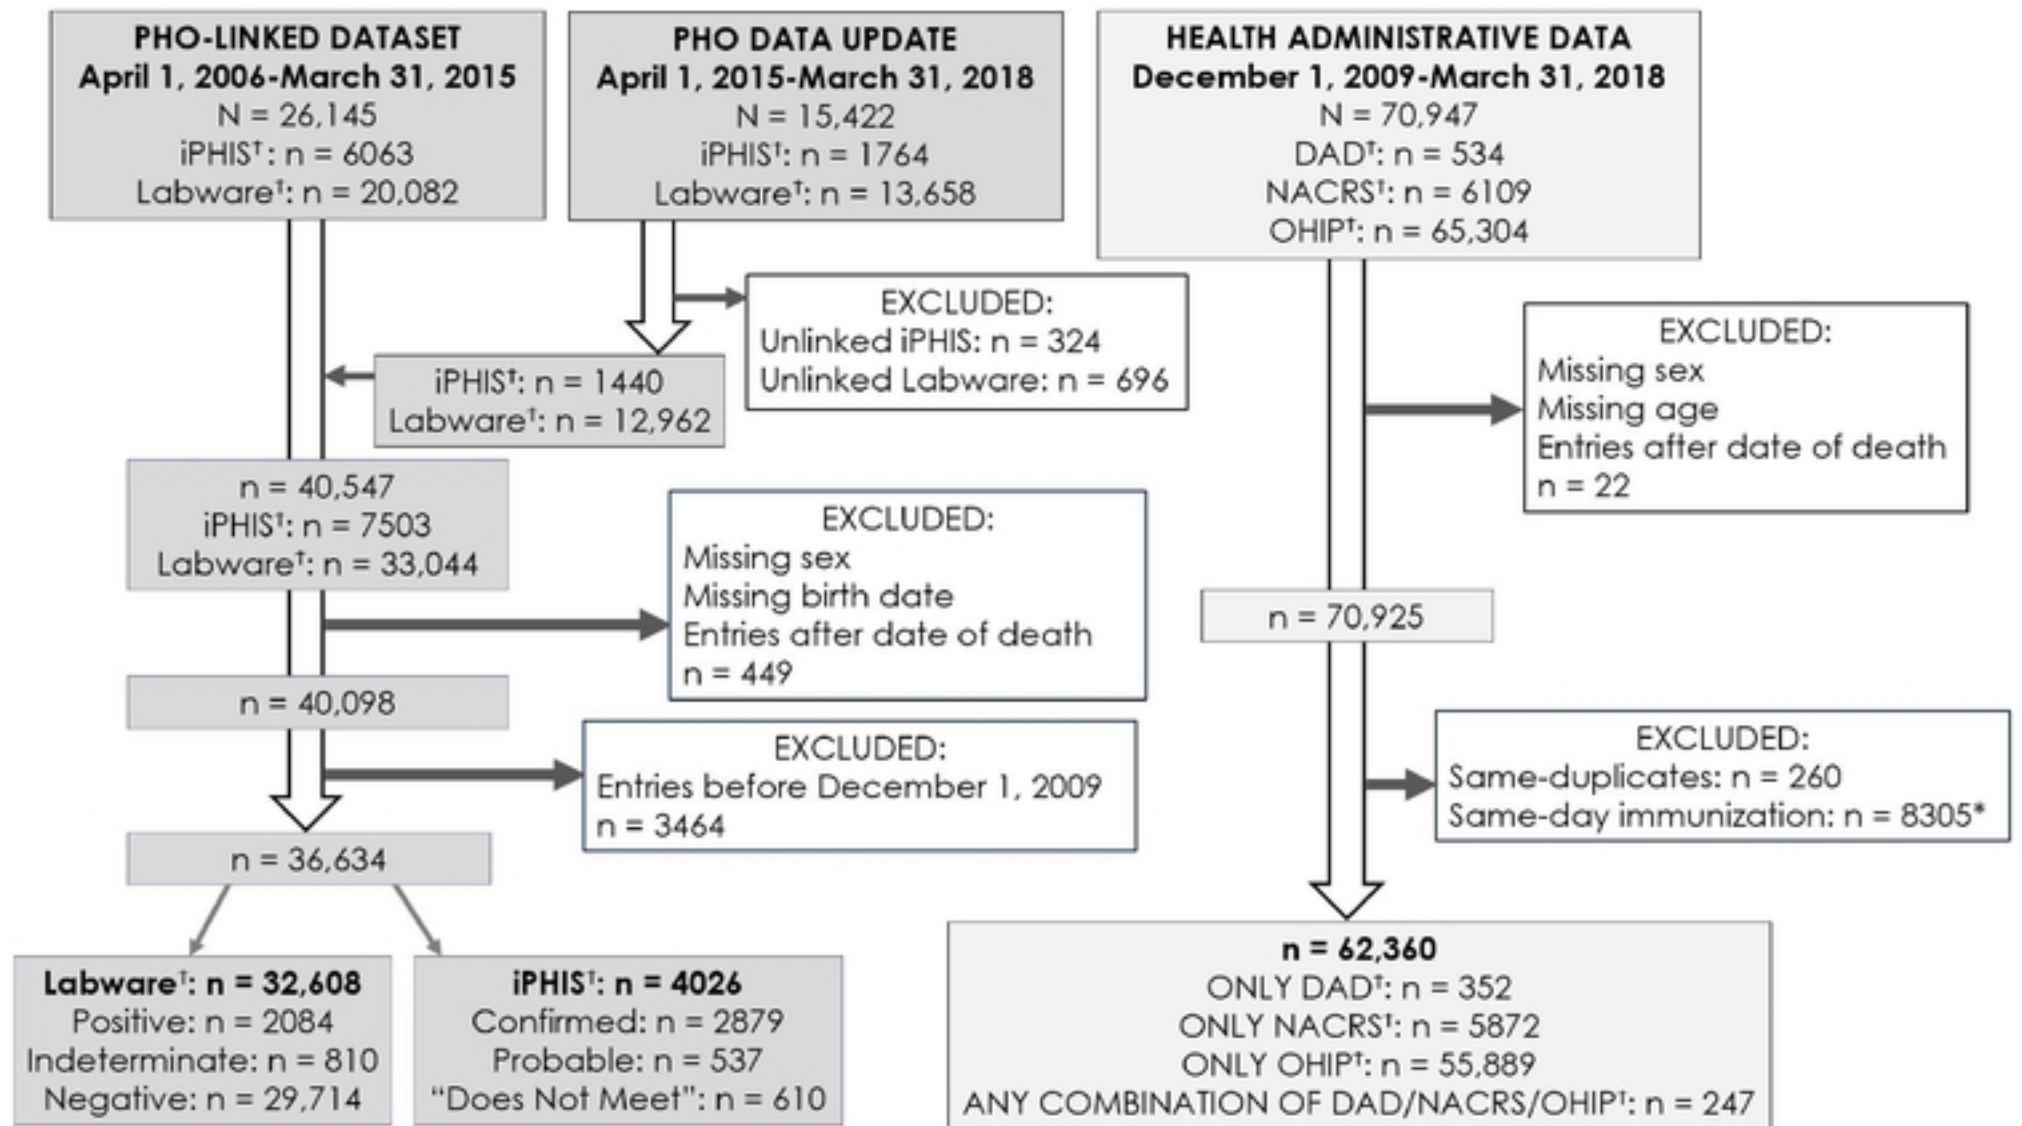

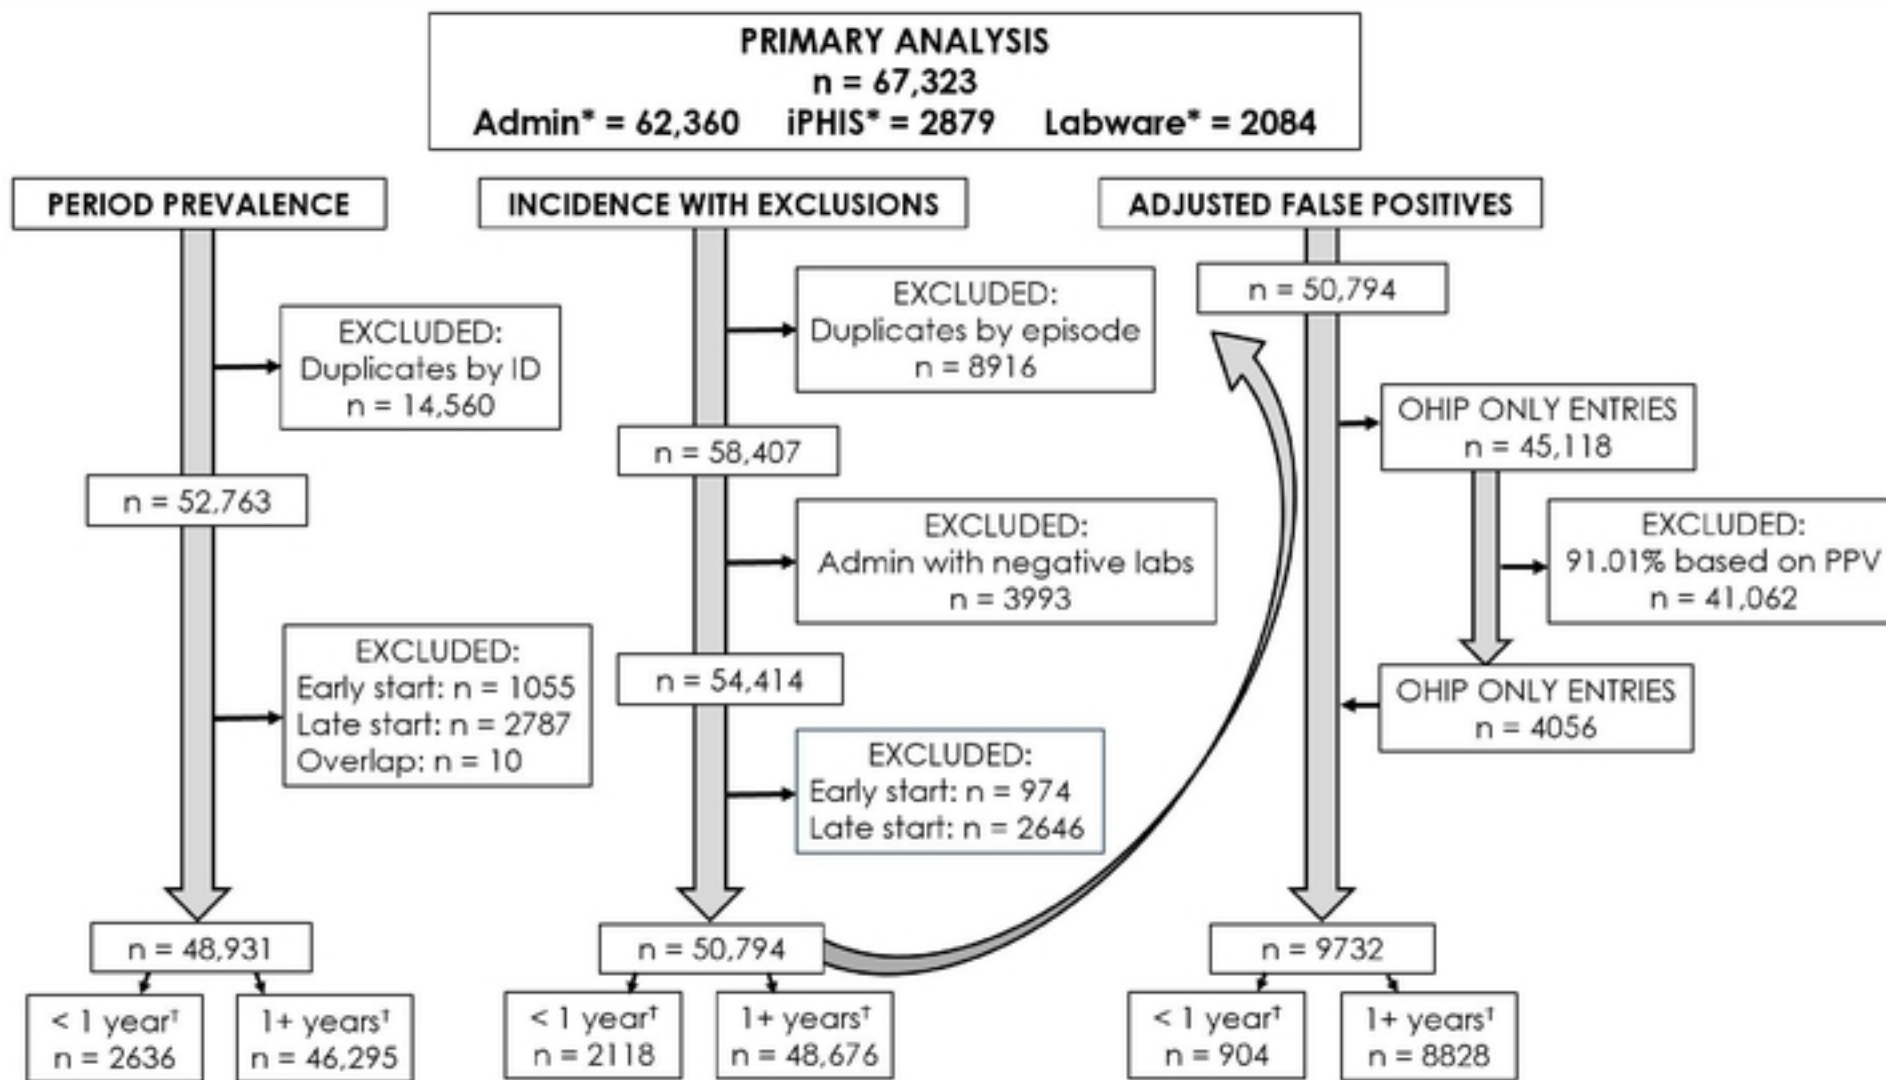

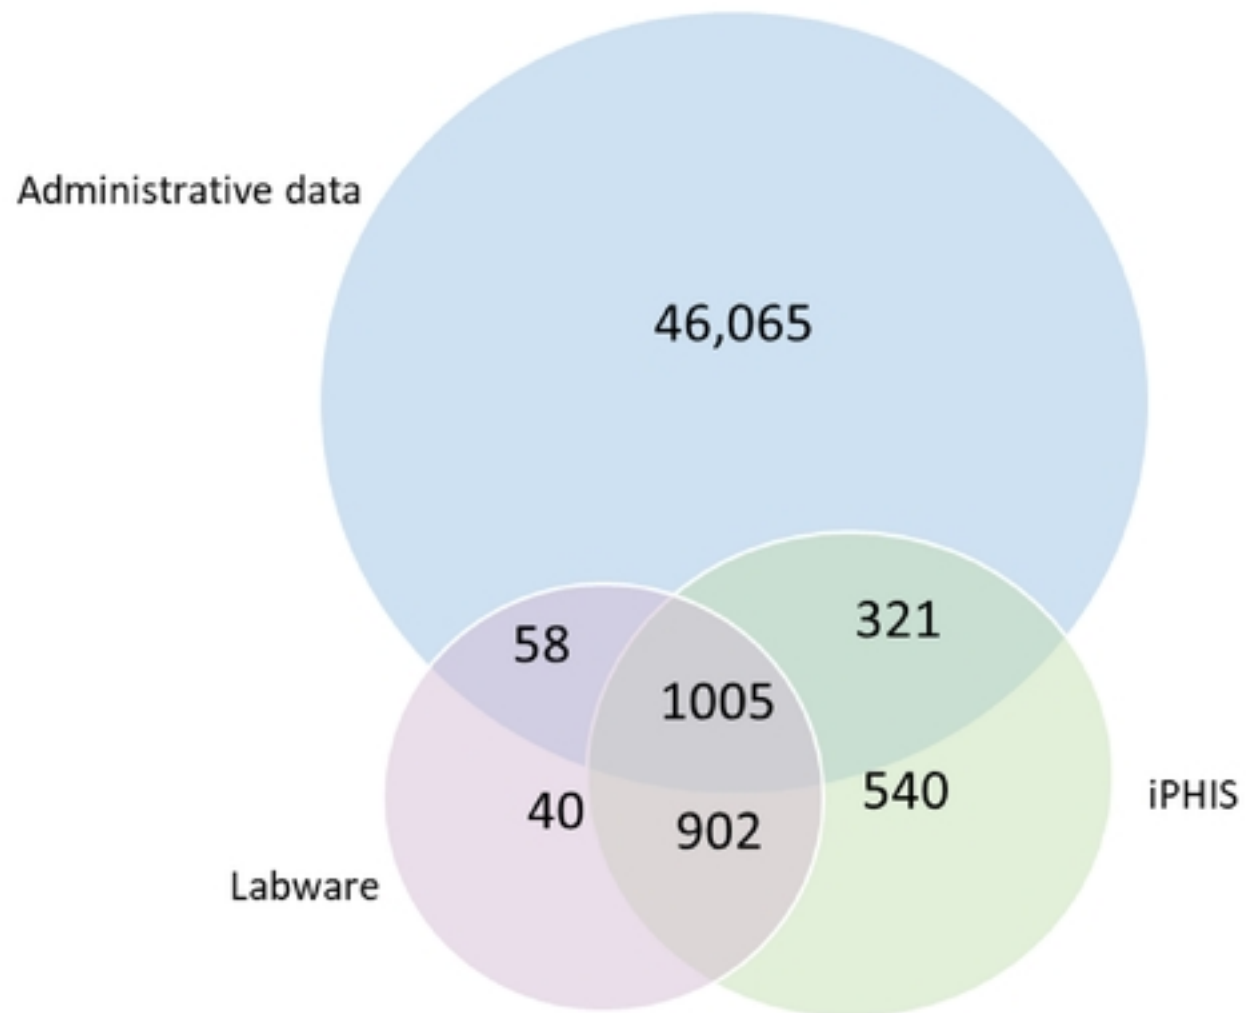

Source: http://medrxiv.org/content/10.1101/2022.08.05.22278478v1.full.pdf
